# Supplementary material for: Young People’s Online Help-Seeking and Mental Health Difficulties: Systematic Narrative Review
Source: PubMed Central journal article supplement (PMC6891826; doi:10.2196/13873), 2019-11-19
Supplement: jmir_v21i11e13873_app2.pdf [file jmir_v21i11e13873_app2.pdf]

|                              |     |     |     |     |          |          |     |          |          |     |     |     |     |          |
|------------------------------|-----|-----|-----|-----|----------|----------|-----|----------|----------|-----|-----|-----|-----|----------|
| Bradford.& Rickwood, (2014), | Yes | Yes | Yes | Yes | Yes      | Yes      | Yes | Yes      | Yes      | Yes | Yes | Yes | Yes | Strong   |
| Burns et al (2016).          | Yes | Yes | Yes | Yes | Yes      | Yes      | No  | Yes      | Yes      | Yes | Yes | Yes | Yes | Strong   |
| Burns et al (2010).          | Yes | Yes | Yes | No  | Yes      | Not sure | No  | Yes      | Yes      | Yes | Yes | Yes | Yes | Moderate |
| Ellis et al. (2013).         | Yes | Yes | Yes | No  | Yes      | Not sure | No  | Yes      | Yes      | Yes | Yes | Yes | Yes | Moderate |
| Ellis et al(2012).           | Yes | Yes | Yes | No  | Yes      | Not sure | Yes | Yes      | Yes      | Yes | Yes | Yes | Yes | Moderate |
| Feng, & Campbell (2011).     | Yes | Yes | Yes | Yes | Yes      | Not sure | Yes | Yes      | Yes      | Yes | Yes | Yes | Yes | Strong   |
| Frost & Casey (2016)         | Yes | Yes | Yes | Yes | Yes      | Not sure | Yes | Yes      | Yes      | Yes | Yes | Yes | Yes | Strong   |
| Horgan & Sweeney (2010).     | Yes | Yes | Yes | Yes | Yes      | Not sure | Yes | Yes      | Yes      | Yes | Yes | Yes | Yes | Strong   |
| Mars et al (2015).           | Yes | Yes | Yes | Yes | Yes      | Not sure | Yes | Yes      | Yes      | Yes | Yes | Yes | Yes | Strong   |
| Mok, Jorm & Pirkis (2016)    | Yes | Yes | Yes | Yes | yes      | Not sure | No  | Yes      | Yes      | Yes | Yes | Yes | Yes | Moderate |
| O'Dea & Campbell (2011).     | Yes | Yes | Yes | No  | Not sure | Not sure | Yes | Not sure | Not sure | Yes | Yes | Yes | Yes | Weak     |
| Ruppel & McKinley (2015).    | Yes | Yes | Yes | Yes | Yes      | Not sure | No  | Yes      | Yes      | Yes | Yes | Yes | Yes | Moderate |
| Spears et al (2015).         | Yes | Yes | Yes | Yes | Yes      | Yes      | Yes | Yes      | Yes      | Yes | Yes | Yes | Yes | Strong   |

#### Quality Assessment for Cohort Studies

1. Did study address a clearly focused issue?
2. Cohort/ sample recruited in an acceptable way?
3. Exposure accurately measured to minimise bias?
4. Outcome accurately measured to minimise bias?
5. Have authors identified important confounding factors?
6. Have authors accounted for confounding factors in design and/or analysis?
7. Do you believe the results?
8. Can results be more widely applied?
9. Do the results of this study fit with other available evidence?

| Authors (year)                      | 1   | 2        | 3   | 4   | 5   | 6        | 7   | 8   | 9   | Overall quality rating |
|-------------------------------------|-----|----------|-----|-----|-----|----------|-----|-----|-----|------------------------|
| Barker et al (2017).                | Yes | Not sure | Yes | Yes | No  | No       | Yes | Yes | Yes | Moderate               |
| Haner & Pepler, D. (2016).          | Yes | Yes      | Yes | Yes | Yes | Not sure | Yes | Yes | Yes | Strong                 |
| Rickwood, Mazzer, & Telford (2015). | Yes | Yes      | Yes | Yes | Yes | Yes      | Yes | Yes | Yes | Strong                 |

#### Quality Assessment Table for RCT Studies

1. Did study address a clearly focused issue?

2. Was the assignment of participants to conditions randomised?
3. Were all of participants who entered the trial properly accounted for at its conclusion?
4. Were participants, health workers and study personal 'blind' to treatment?
5. Were the groups similar at the start of the trial?
6. Aside from the experimental intervention, were the groups treated equally?
7. How large was the treatment effect?
8. Will the results help locally?
9. Can the results be applied to the local population?
10. Were all clinically important outcomes considered?
11. Are the benefits worth the harms and costs?

| <b>Authors<br/>(year)</b>                | <b>1</b> | <b>2</b> | <b>3</b> | <b>4</b>    | <b>5</b> | <b>6</b> | <b>7</b>     | <b>8</b> | <b>9</b> | <b>10</b> | <b>11</b> | <b>Overall<br/>quality<br/>rating</b> |
|------------------------------------------|----------|----------|----------|-------------|----------|----------|--------------|----------|----------|-----------|-----------|---------------------------------------|
| Kauer et al<br>(2017)                    | Yes      | Yes      | Yes      | Yes         | Yes      | Yes      | Not<br>large | Yes      | Yes      | Yes       | Yes       | Strong                                |
| Sanci,<br>Kauer, &<br>Buhagiar<br>(2017) | Yes      | Yes      | Yes      | Not<br>Sure | Yes      | Yes      | Not<br>large | Yes      | Yes      | Yes       | Yes       | Strong                                |
